# Supplementary material for: Improving prediction performance of colon cancer prognosis based on the integration of clinical and multi-omics data
Source: Springer Nature journal article supplement (doi:10.1186/s12911-020-1043-1), 2020-02-07
Supplement: 12911_2020_1043_MOESM5_ESM.pdf [file 12911_2020_1043_MOESM5_ESM.pdf]

Strata age=1 age=2 age=3 age=4

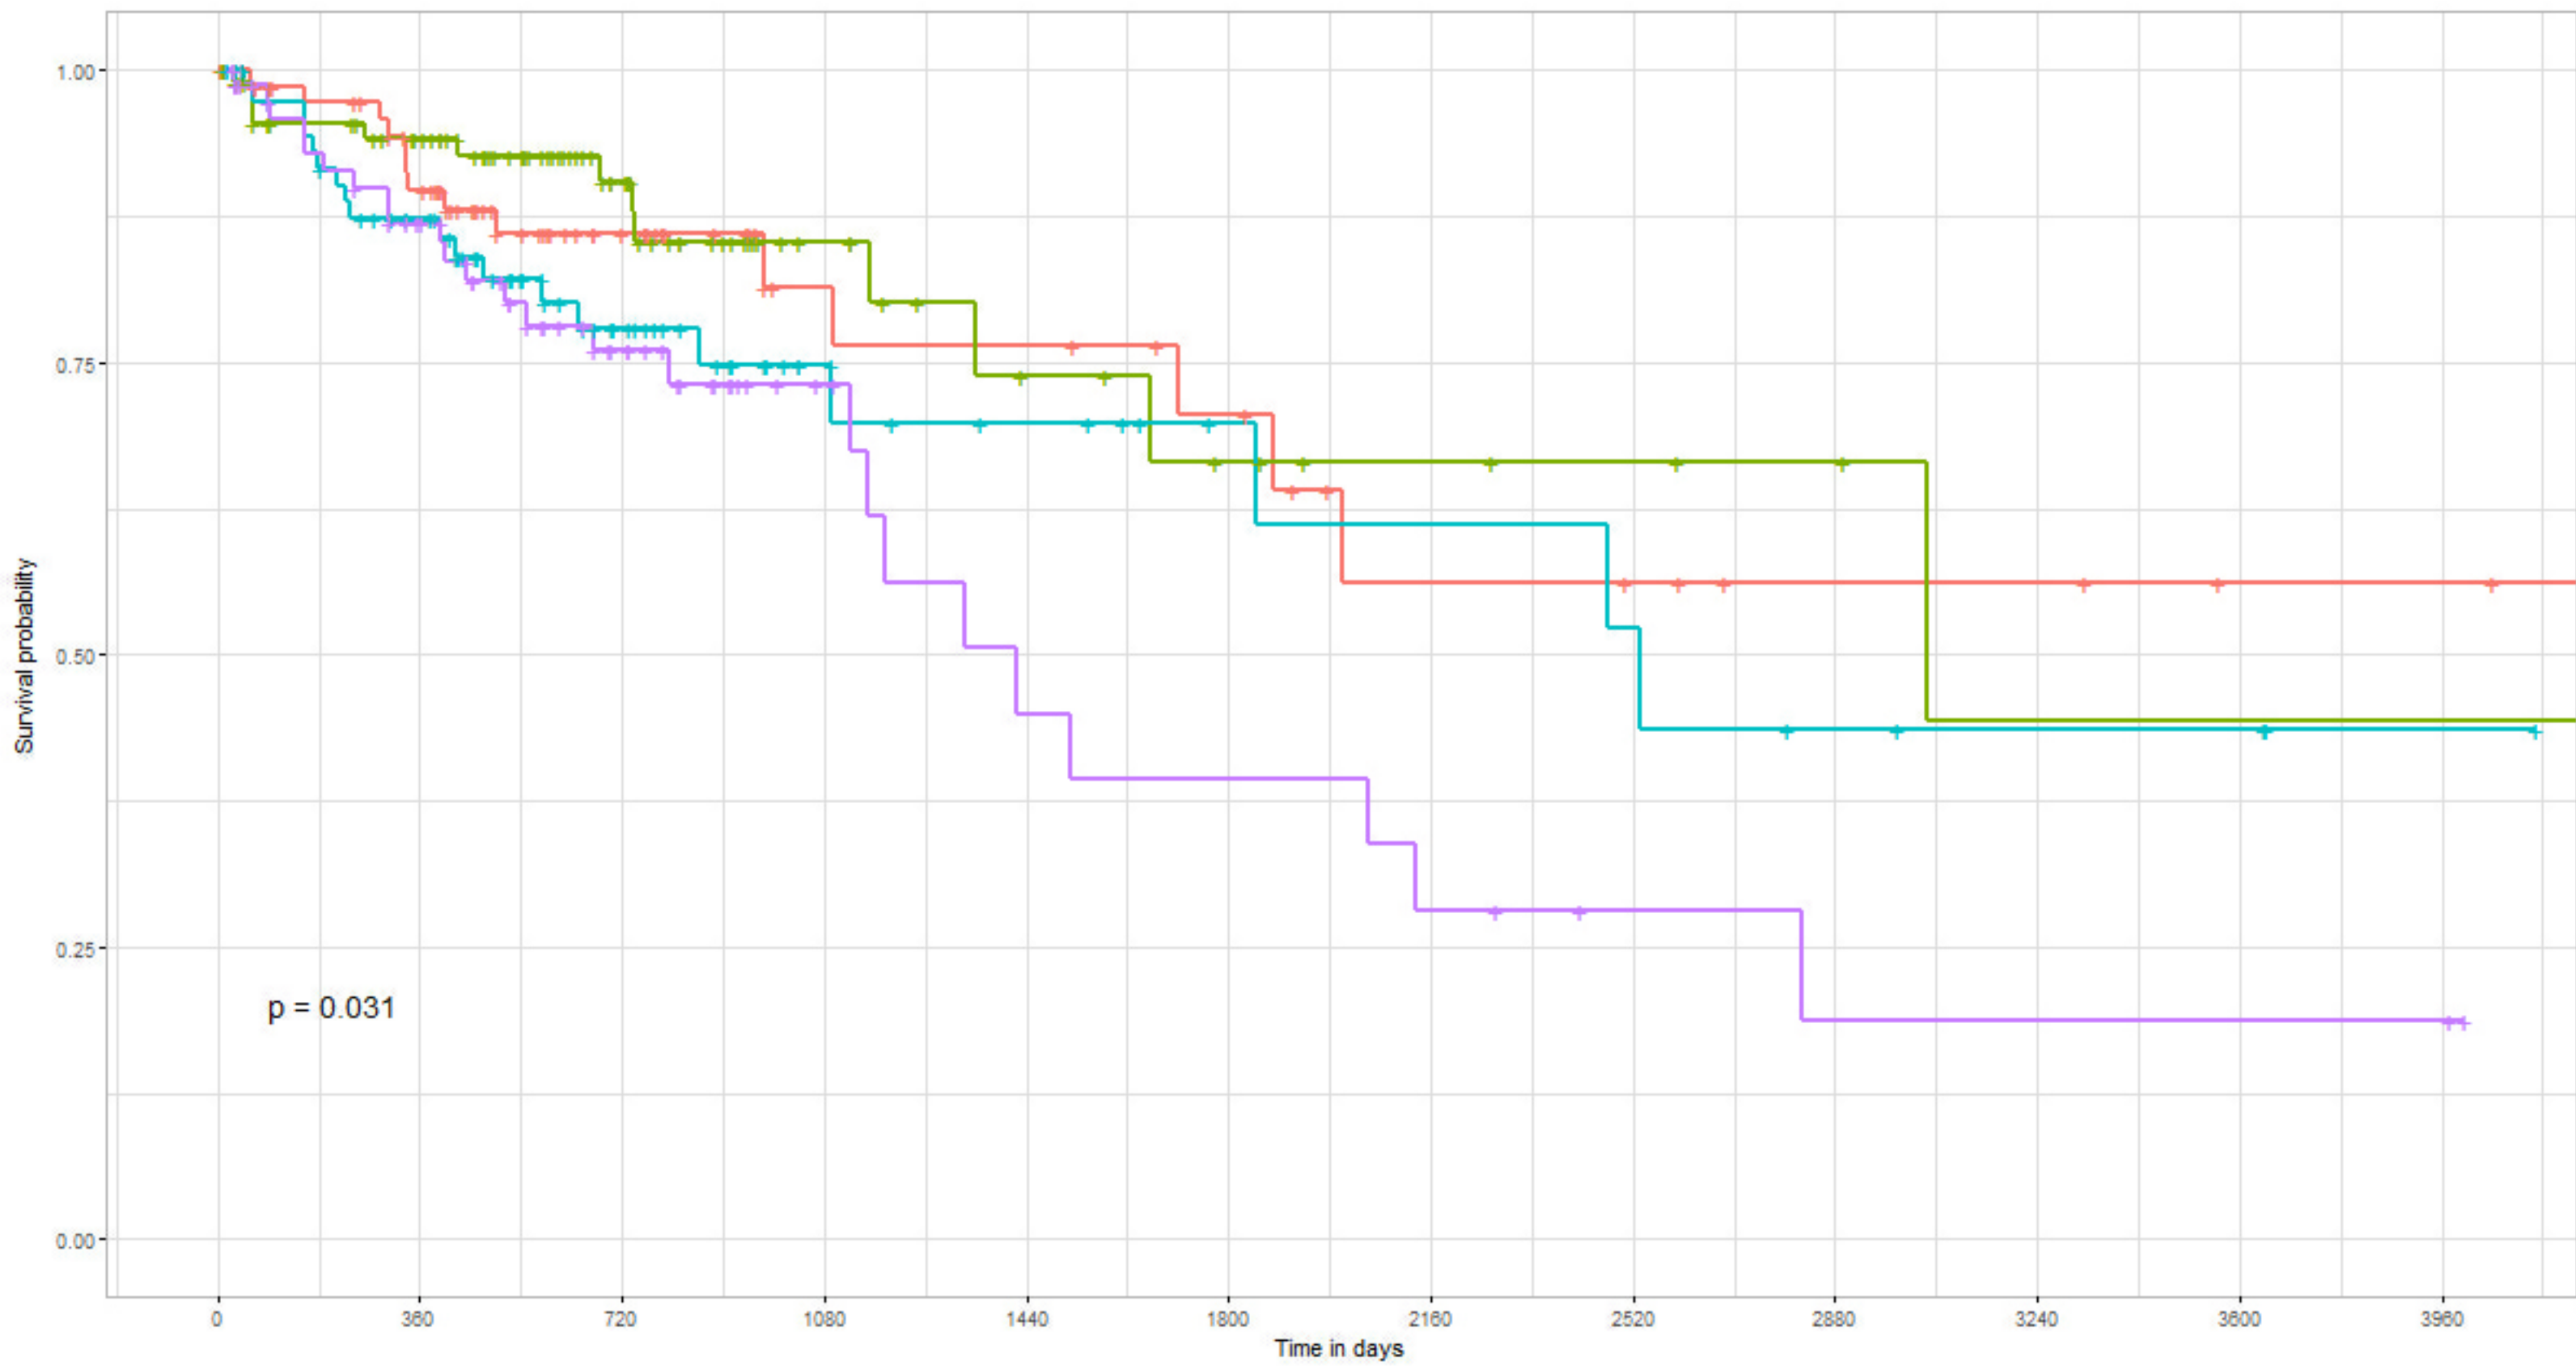

Number at risk

| Strata | 0  | 360 | 720 | 1080 | 1440 | 1800 | 2160 | 2520 | 2880 | 3240 | 3600 | 3960 |
|--------|----|-----|-----|------|------|------|------|------|------|------|------|------|
| age=1  | 86 | 59  | 31  | 16   | 15   | 12   | 7    | 6    | 4    | 4    | 2    | 2    |
| age=2  | 98 | 71  | 39  | 18   | 11   | 8    | 6    | 5    | 4    | 2    | 2    | 2    |
| age=3  | 79 | 56  | 31  | 16   | 12   | 8    | 7    | 6    | 4    | 3    | 3    | 1    |
| age=4  | 81 | 55  | 32  | 14   | 8    | 7    | 5    | 3    | 2    | 2    | 2    | 2    |

Time in days
